# Supplementary material
Source: publisher figshare collection journal article supplement (https://sage.figshare.com/ndownloader/files/14375726)

**Supplemental Table** Hemodynamic and respiratory parameters

| Pt no. | Intubated | PaO <sub>2</sub> | PaCO <sub>2</sub> | Hemoglobin (g/dl) | Temperature (°C) | Cardiovascular supportive infusion |
|--------|-----------|------------------|-------------------|-------------------|------------------|------------------------------------|
| 1      | -         | 70               | 30                | 6.3               | 34.4             | NE, VP                             |
| 2      | +         | 66               | 42                | 9.2               | 38.5             | NE                                 |
| 3      | +         | 124              | 45                | 8.3               | 35.6             | NE                                 |
| 4      | -         | 64               | 52                | 10.9              | 38.0             | NE, AMIO                           |
| 5      | +         | 69               | 32                | 5.4               | 38.4             | NE                                 |
| 6      | -         | 108              | 37                | 8.4               | 35.8             | NE                                 |

*AMIO* = amiodarone. *NE* = norepinephrine. *PaCO<sub>2</sub>*= arterial partial pressure of carbon dioxide (average value during measurements). *PaO<sub>2</sub>*= arterial partial pressure of oxygen (lowest recorded value during measurements). *VP* = vasopressin.

**Supplemental Figures** Autoregulation curves for six patients with averaged cerebral oximetry index (COx) values sorted by arterial blood pressure in three sequential 4-hour periods. Optimal blood pressure (MAP<sub>OPT</sub>), defined as the mean arterial pressure (MAP) associated with the most robust autoregulation (lowest COx), was identified in each 4-hour period (*arrows*). Error bars represent the standard error of the mean.

**Patient 1** 69-year-old patient with *C. Difficile* colitis. MAP<sub>OPT</sub> at 80 mmHg (hours 1-8) and 95 mmHg (hours 9-10). \*Monitoring time only 10 hours due to arterial line removal.

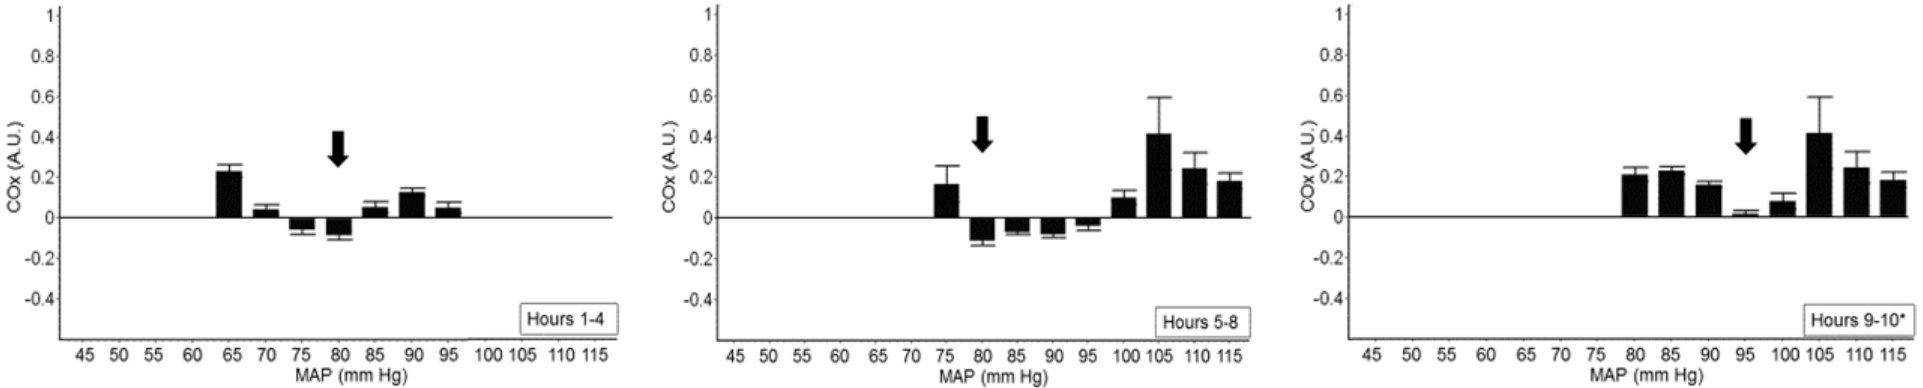

**Patient 2** 71-year-old patient with urosepsis. MAP<sub>OPT</sub> at 75 mmHg (hours 1-4), 90 mmHg (hours 5-8), and 55 mmHg (hours 9-12).

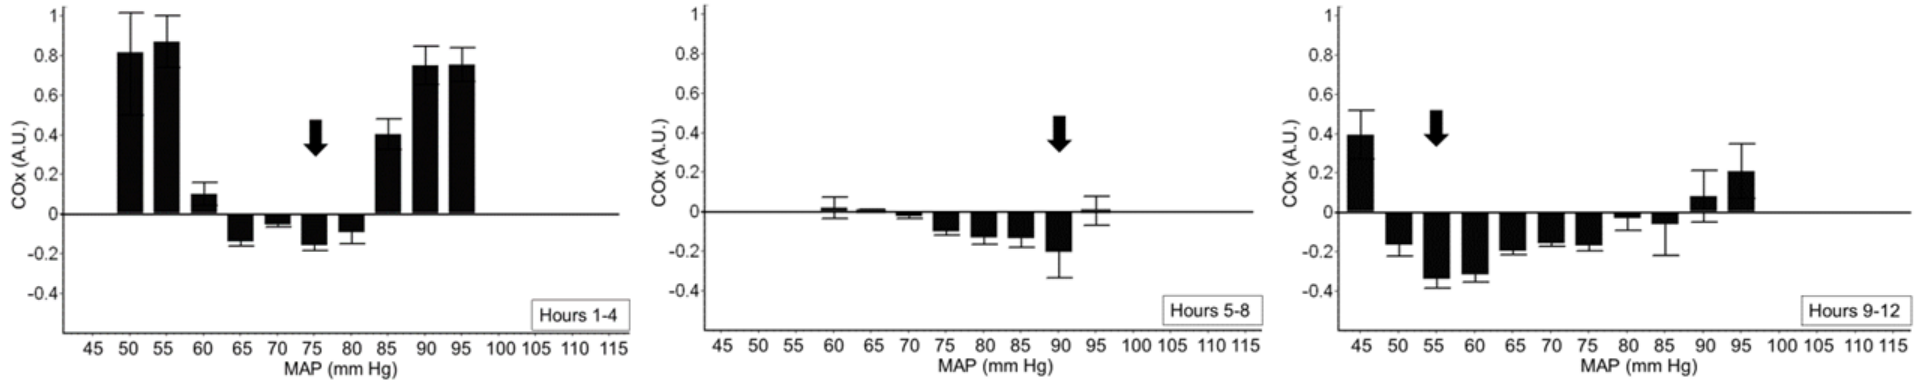

**Patient 3** 71-year-old patient with pulmonary Nocardiosis. MAP<sub>OPT</sub> at 95 mmHg (hours 1-4), 75 mmHg (hours 5-8), and 100 mmHg (hours 9-12).

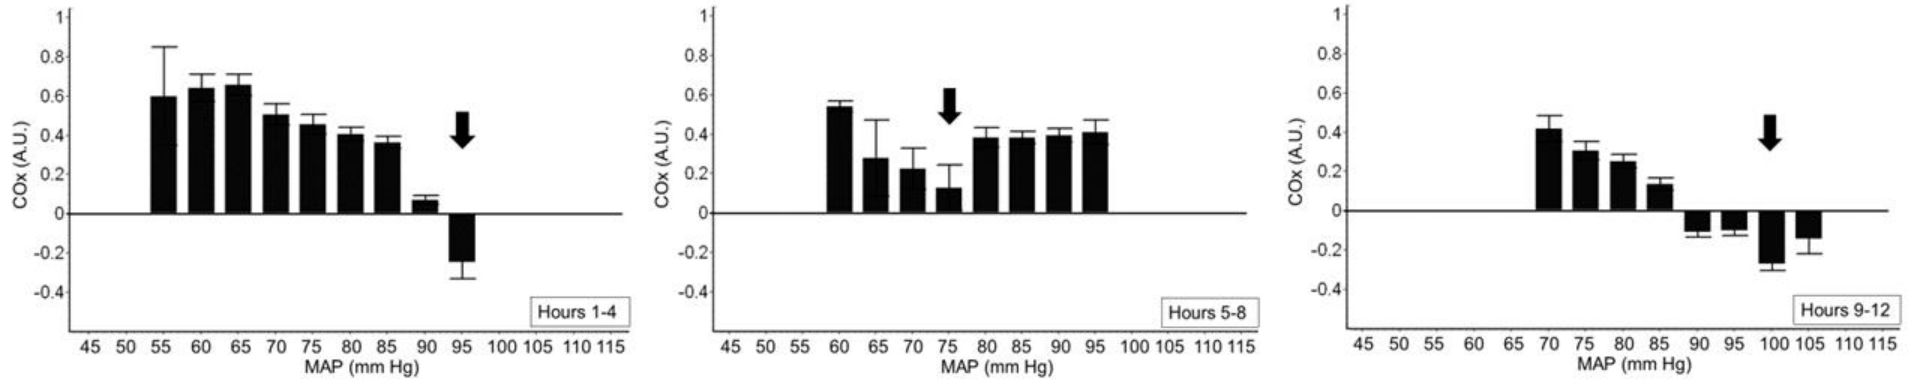

**Patient 4** 58-year-old patient with *Group B Streptococcus* bacteremia and rhinovirus. MAP<sub>OPT</sub> at 90 mmHg (hours 1-4), 70 mmHg (hours 5-8), and 100 mmHg (hours 9-12).

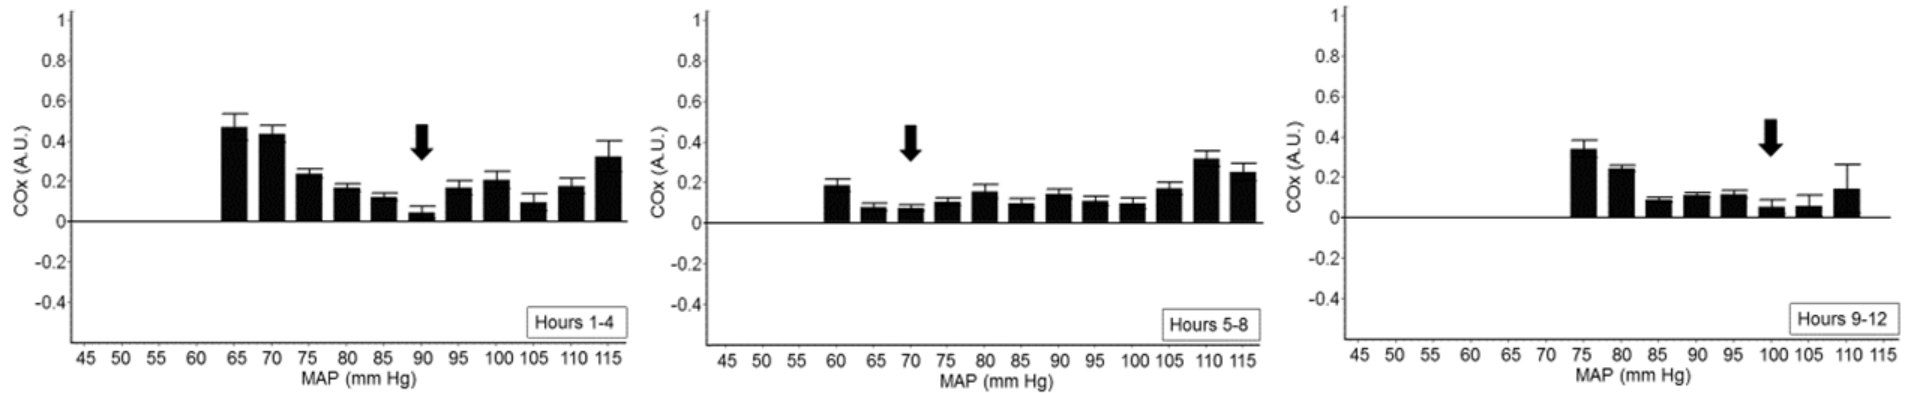

**Patient 5** 54-year-old patient with Methicillin-resistant Staphylococcus aureus (MRSA) bacteremia. MAP<sub>OPT</sub> at 65 mmHg (hours 1-8) and 55 mmHg (hours 9-12).

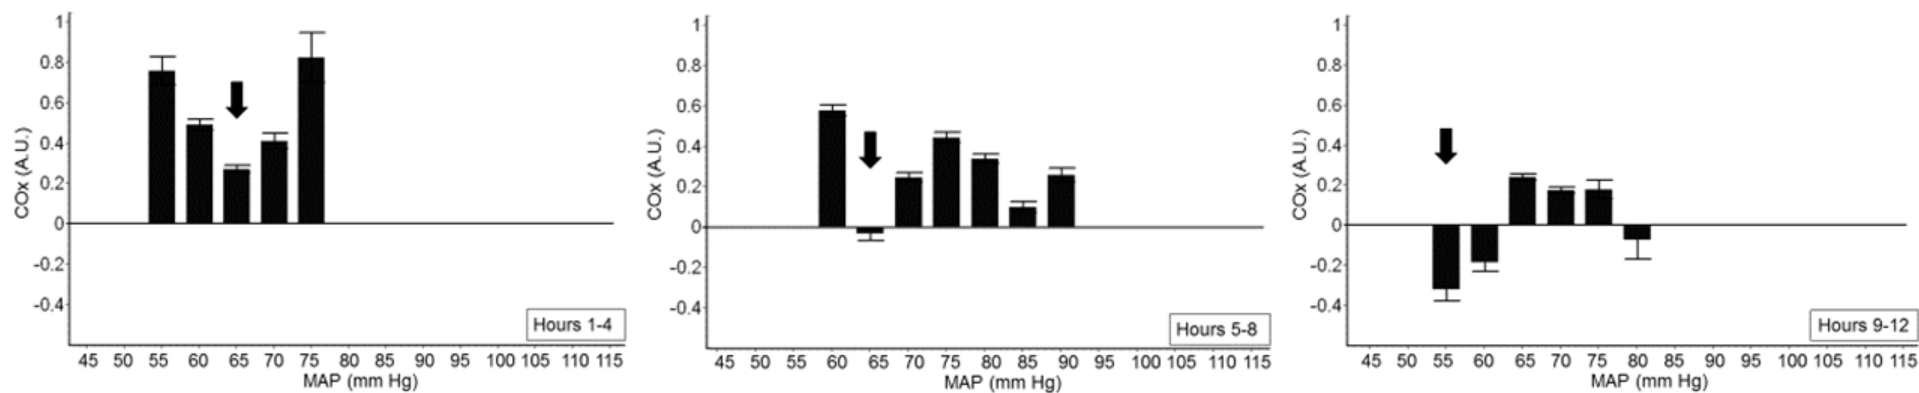

**Patient 6** 76-year-old patient with a pericystic abscess. MAP<sub>OPT</sub> at 115 mmHg (hours 1-4), 100 mmHg (hours 5-9), and 100 mmHg (hours 9-12).

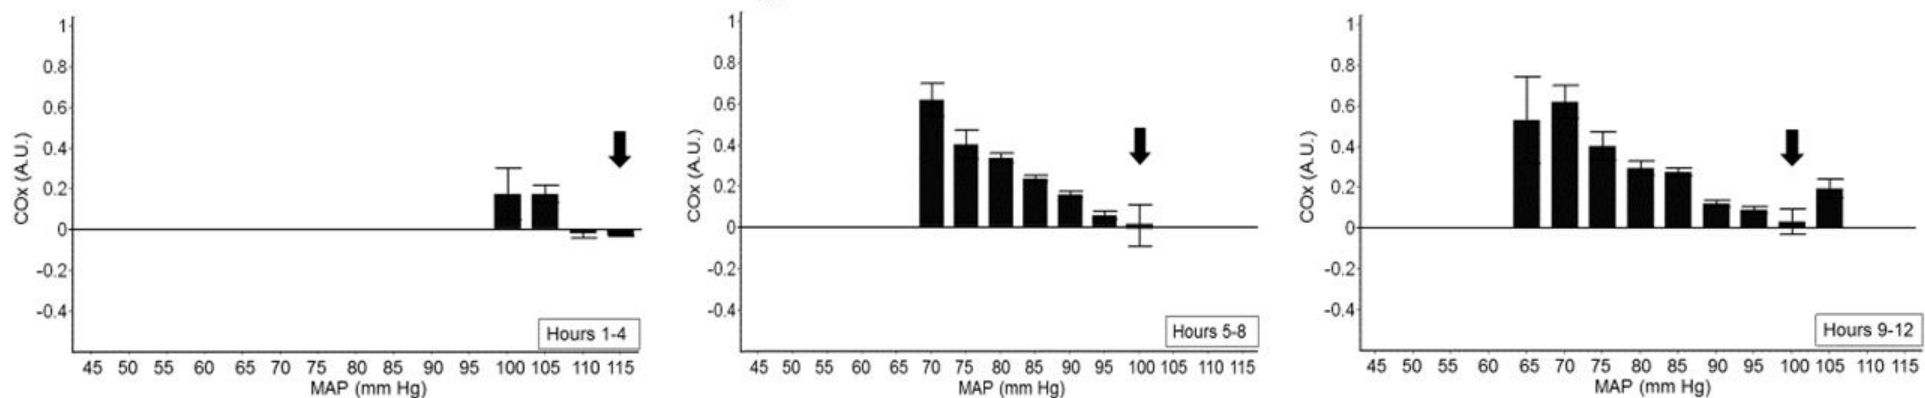

Supplement: Supplementary file 1 [file 14375726]
